# Supplementary material for: A new species of the toothed toad Oreolalax (Anura, Megophryidae) from Sichuan Province, China
Source: Zookeys. 2020 Apr 22;929:93–115. doi: 10.3897/zookeys.929.49748 (PMC7192958; doi:10.3897/zookeys.929.49748)
Supplement: Supplementary material 1 — Table S1 [file zookeys-929-093-s001.xls]

## Sheet: Table S1
Table S1. Measurements of the Oreolalax longmenmontis sp. nov. and its three relatives. See abbreviations for characters in the Materials and methods section.
Species	Locaton	Measurements(mm)	SVL	HDL	HDW	SL	NS	EN	IND	IOD	ED	UEW	LW	LAL	THL	TL	TW	TFL	FL	FIL	FIIL	FIIIL	FIVL	TOE1L	TOE2L	TOE3L	TOE4L	TOE5L
Oreolalax longmenmontis sp. nov.	Pegnzhou City, Sichuan Province,China	CIB20180522001	64.2	20.6	23.3	9.5	4.6	4.3	4.5	6.2	6.3	5.6	6.3	31.2	31.7	32.8	6.9	47.9	31.9	6.1	5.4	12.1	9.4	5.7	11.6	19.2	27.7	17.2
Oreolalax longmenmontis sp. nov.	Pegnzhou City, Sichuan Province,China	CIB20180527002	54.9	17.8	21	7.9	4.4	4.2	4.1	6.1	6.4	4.6	5.8	29.3	30.5	30	7.3	44.7	27.7	5.8	6.8	11.7	8	4.9	11.4	18.8	25.2	16.4
Oreolalax longmenmontis sp. nov.	Pegnzhou City, Sichuan Province,China	CIB20180526001	51.2	17.2	19.1	7.3	3.8	3.6	3.7	5.5	5.8	5.6	5	28	27.2	25.7	5.4	39.6	25.4	5	4.8	10.1	7.7	4.7	10.2	16.9	23.8	14.9
O. omeimontis	Omei Mt., Emei, Sichuan, China	CIBEMCSQ2019052409	49.9	16	18.9	7.2	3.3	3.9	3.8	5	4.6	3.7	5.2	24.7	23.4	24.3	6.3	37.3	26.3	/	/	/	/	/	/	/	/	/
O. omeimontis	Omei Mt., Emei, Sichuan, China	CIBEMCSQ2019052407	49	16.5	18.6	7.1	3.6	3.4	3.8	5.8	5.1	4	5.5	26.7	22.5	24.5	6.1	37.5	27.4	/	/	/	/	/	/	/	/	/
O. omeimontis	Omei Mt., Emei, Sichuan, China	CIBEMCSQ2019052402	46.4	16.1	18.2	6.6	3	3.4	3.4	4.8	4.8	4	5	26.3	23.8	24	5.7	37.1	24.9	/	/	/	/	/	/	/	/	/
O. omeimontis	Omei Mt., Emei, Sichuan, China	CIBEMCSQ2019052410	49.7	16.6	19.2	7.3	4	3.2	4	4.9	4.9	4.1	5.5	26.3	24.2	24.6	6.6	37.5	28	/	/	/	/	/	/	/	/	/
O. omeimontis	Omei Mt., Emei, Sichuan, China	CIBEMCSQ2019052408	49.7	17.3	18.8	7.3	3.7	3.6	3.6	4.6	4.2	4.2	5.1	26.2	22.5	24	5.8	35.3	26.4	/	/	/	/	/	/	/	/	/
O. omeimontis	Omei Mt., Emei, Sichuan, China	CIBEMCSQ2019052406	51.6	17.4	18.9	7.3	4	3.2	3.7	4.9	5	4.1	5.5	26.9	24.6	25.1	6.3	40	29.3	/	/	/	/	/	/	/	/	/
O. omeimontis	Omei Mt., Emei, Sichuan, China	CIBEMCSQ2019052405	47	16.5	18.5	6.4	3.7	2.8	3.5	4.9	4.6	3.9	4.8	26	23.4	24	6	36.6	27.3	/	/	/	/	/	/	/	/	/
O. omeimontis	Omei Mt., Emei, Sichuan, China	CIBEMCSQ2019052403	45	15.8	16.8	6.2	3.7	2.9	3.1	4.9	4.6	3.8	4.6	23.9	22.5	22	5.3	34.5	23.4	/	/	/	/	/	/	/	/	/
O. nanjiangensis	Guangwu Mt.,NanJiang, Sichuan, China	CIB89704	54	21.1	19.1	8.5	4.2	4.1	4.1	5.4	4.5	4.6	5.6	26.8	29.2	26.4	6.1	38.1	26.9	/	/	/	/	/	/	/	/	/
O. nanjiangensis	Guangwu Mt.,NanJiang, Sichuan, China	CIB89700	55	21.3	19.7	7.9	4.5	3.6	4.2	5.2	5.1	4.8	6.3	26.6	26.6	25.8	6.1	38.1	29	/	/	/	/	/	/	/	/	/
O. nanjiangensis	Guangwu Mt.,NanJiang, Sichuan, China	CIB89693	54.4	21.8	21	7.8	4.5	3.3	3.9	4.3	5.3	6.2	6.2	27.2	28.3	27.4	6.2	40.5	30	/	/	/	/	/	/	/	/	/
O. nanjiangensis	Guangwu Mt.,NanJiang, Sichuan, China	CIB89695	51.4	21	19.5	8.2	4.1	3.8	4.1	5.2	5.2	4.5	5.1	24.5	25.6	25.1	5.7	39.4	26.5	/	/	/	/	/	/	/	/	/
O. popei	Longdong, Baoxing, Sichuan, China	CIB025091	65.6	24.7	24.1	10.1	4.9	5.3	4.8	6.2	6.2	5.9	6.3	29.5	34.3	32.5	6.7	47.3	32.7	/	/	/	/	/	/	/	/	/
O. popei	Longdong, Baoxing, Sichuan, China	CIB025107	64	24.6	23.9	9.9	4.9	4.7	4.7	6.5	6.7	5.8	6.8	29.7	33	32.2	6.6	48.7	31.5	/	/	/	/	/	/	/	/	/
O. popei	Longdong, Baoxing, Sichuan, China	CIB025113	65.6	24.9	24.4	9.4	4.2	4.8	4.7	6.5	6.3	6.3	6.9	28.7	32.1	31.1	7.3	45.8	31.4	/	/	/	/	/	/	/	/	/
O. popei	Longdong, Baoxing, Sichuan, China	CIB025115	65.9	24.3	24.1	10.2	5.3	4.8	5.1	6.6	6.2	6.2	6.7	30.8	32.2	30.6	7.6	45.2	31.6	/	/	/	/	/	/	/	/	/
O. popei	Longdong, Baoxing, Sichuan, China	CIB025121	63.6	24	24.7	9.6	4.5	4.1	4	5.6	6.7	5.9	5.3	29.2	30.1	31	7.3	48.1	30	/	/	/	/	/	/	/	/	/
O. popei	Longdong, Baoxing, Sichuan, China	CIB025126	60.7	22.4	21.9	9	4.5	4.3	4.7	5.8	6.2	6	5.3	30.2	31.1	30.4	6.5	46.1	30.9	/	/	/	/	/	/	/	/	/
O. popei	Longdong, Baoxing, Sichuan, China	CIB025129	59.3	22.8	22.9	9.7	4.4	4.4	4.5	6.8	5.5	5.9	6.6	28.5	30.2	29.1	6.8	44.6	29.9	/	/	/	/	/	/	/	/	/
O. popei	Longdong, Baoxing, Sichuan, China	CIB025140	64.6	22.9	23.1	9.8	4.4	4.6	4.8	6.4	6.3	5.6	7.1	31	32.6	31.5	7.1	47	30.6	/	/	/	/	/	/	/	/	/
O. popei	Longdong, Baoxing, Sichuan, China	CIB025142	65.9	24.4	24.8	10.5	4.5	4.7	5	6.4	6.7	6.1	7.3	31.6	32.4	32.4	7.7	48.7	32.1	/	/	/	/	/	/	/	/	/
O. popei	Longdong, Baoxing, Sichuan, China	CIB025143	68.4	24.6	24.9	10.3	4.7	4.7	5.1	6.9	6.8	6.2	6.5	32.6	33.9	33.2	7.8	49.7	33.1	/	/	/	/	/	/	/	/	/
O. chuanbeiensis	Pingwu, Sichuan, China	CIB89684	56	18.3	18	8.3	4.1	4	4.5	6.2	5	4.5	4.9	26.8	25.8	24.6	6.9	38.3	26.8	/	/	/	/	/	/	/	/	/
O. chuanbeiensis	Pingwu, Sichuan, China	CIB89681	50.5	18.3	17.9	8.2	4.5	3.6	4.7	5.5	5.2	4.2	5.4	25.7	26.6	26.2	6.8	38.8	25	/	/	/	/	/	/	/	/	/
O. chuanbeiensis	Pingwu, Sichuan, China	CIB89683	46.7	17.5	17.5	7.8	3.8	3.4	4.1	5.9	5.1	4.1	5.1	24.9	24.8	23	4.7	36	24.5	/	/	/	/	/	/	/	/	/
O. chuanbeiensis	Pingwu, Sichuan, China	CIB89680	48	17.5	17.2	7.6	4	3.5	4.8	5.8	4.6	4.2	5.4	26.1	23.6	24.4	6.3	39.1	26.2	/	/	/	/	/	/	/	/	/
O. chuanbeiensis	Pingwu, Sichuan, China	CIB89679	50.2	17.8	17.5	7.7	4.2	3.9	4.9	5.5	5	4.1	5.8	26.6	26	26.6	6.7	38.7	26.9	/	/	/	/	/	/	/	/	/
O. chuanbeiensis	Pingwu, Sichuan, China	CIB89689	50.6	17.9	17.2	7.3	4	3.3	4.5	5.7	4.8	4	5.7	26.8	26.3	25.2	7	37.2	24.4	/	/	/	/	/	/	/	/	/
O. chuanbeiensis	Pingwu, Sichuan, China	CIB89677	54.8	19.1	19.2	8.2	4.7	3.9	4.9	6.1	5.5	4.3	6.5	26.9	25.8	24.7	7.2	38	25.6	/	/	/	/	/	/	/	/	/
O. chuanbeiensis	Pingwu, Sichuan, China	CIB89674	51.8	17.7	17.2	8.1	4.4	3.5	4.8	5.7	5.1	4.1	6.2	26.9	26.8	25.6	4.4	38.2	26.2	/	/	/	/	/	/	/	/	/
O. chuanbeiensis	Pingwu, Sichuan, China	CIB89675	53.3	18.7	18.2	8.1	4.5	3.5	4.9	5.8	5.3	4.4	6.7	27.5	26.9	25.5	7.4	40.5	27	/	/	/	/	/	/	/	/	/
O. chuanbeiensis	Pingwu, Sichuan, China	CIB89678	52	18.2	17.7	8.4	4.7	3.6	4.8	6	5	4.2	5.7	27.1	26.1	25.3	6.6	39.7	27.3	/	/	/	/	/	/	/	/	/
O. chuanbeiensis	Pingwu, Sichuan, China	CIB89676	49.2	17.1	17.4	7.7	4.2	3.5	4.9	5.7	4.9	4	5.1	25.5	27.3	23.9	6.6	36.6	24.4	/	/	/	/	/	/	/	/	/
O. chuanbeiensis	Pingwu, Sichuan, China	CIB89685	48.9	17.3	17.8	7.1	4	3.2	4.6	6	5.1	3.9	5.6	27	27.1	26.2	6.5	39.5	26	/	/	/	/	/	/	/	/	/
O. chuanbeiensis	Pingwu, Sichuan, China	CIB89682	50.2	17.7	17.6	7.6	4.4	3.4	4.6	5.7	5	3.9	5.7	26	25.6	24.5	6.7	37.4	24.9	/	/	/	/	/	/	/	/	/
